## CORRECTION

# Correction: Mechanical behavior of shark vertebral centra at biologically relevant strains

**Danielle N. Ingle, Lisa J. Natanson and Marianne E. Porter**

There was an error in *J. Exp. Biol.* (2018) **221**, jeb188318 (doi:10.1242/jeb.188318).

The middle initial of the first author, Danielle Nicole Ingle, should be N. rather than I. The correct name appears above, and both the online full-text and PDF versions of the article have been updated.

The authors apologise for any inconvenience.
